# Supplementary material for: Development of a camera trap for perching dragonflies: a new tool for freshwater environmental assessment
Source: PeerJ. 2020 Sep 18;8:e9681. doi: 10.7717/peerj.9681 (PMC7505062; doi:10.7717/peerj.9681)
Supplement: Supplemental Information 4 [file peerj-08-9681-s004.xlsx]

## Sheet: S1 Data
S1 The result of camera trapping at each site.
(a) "Field"
file name*	proper detection	date	timestamp	not analyzed to avoid double count**	remarks
TLC00008.JPG	0	2016-10-21	09:44:14	0
TLC00009.JPG	0	2016-10-21	10:02:42	1
TLC00010.JPG	0	2016-10-21	10:02:44	0
TLC00011.JPG	0	2016-10-21	10:08:06	0
TLC00012.JPG	0	2016-10-21	10:09:02	0
TLC00013.JPG	0	2016-10-21	10:10:50	0
TLC00014.JPG	0	2016-10-21	10:12:24	0
TLC00015.JPG	0	2016-10-21	10:29:02	0
TLC00016.JPG	0	2016-10-21	10:34:22	0
TLC00017.JPG	0	2016-10-21	10:37:06	0
TLC00018.JPG	0	2016-10-21	10:38:16	0
TLC00019.JPG	0	2016-10-21	11:23:50	0
TLC00020.JPG	0	2016-10-21	11:24:02	1
TLC00021.JPG	0	2016-10-21	11:24:06	0
TLC00022.JPG	0	2016-10-21	11:40:30	0
TLC00023.JPG	0	2016-10-21	11:44:12	0
TLC00024.JPG	0	2016-10-21	11:44:54	0
TLC00025.JPG	0	2016-10-21	11:48:06	0
TLC00026.JPG	0	2016-10-21	11:50:42	0
TLC00027.JPG	0	2016-10-21	14:18:02	0
TLC00028.JPG	0	2016-10-21	14:18:28	1
TLC00029.JPG	0	2016-10-21	14:18:30	0
TLC00030.JPG	0	2016-10-21	14:25:36	0
TLC00031.JPG	0	2016-10-21	14:26:04	0
TLC00032.JPG	0	2016-10-21	14:26:36	1
TLC00033.JPG	0	2016-10-21	14:26:38	0
TLC00034.JPG	0	2016-10-21	14:37:34	0
TLC00035.JPG	0	2016-10-21	14:38:40	0
TLC00036.JPG	0	2016-10-21	14:39:24	0
TLC00037.JPG	0	2016-10-21	14:41:42	0
TLC00038.JPG	0	2016-10-21	14:54:08	0
TLC00039.JPG	0	2016-10-21	14:56:28	0
TLC00040.JPG	0	2016-10-21	15:16:22	0
TLC00041.JPG	0	2016-10-21	15:18:36	0
TLC00042.JPG	0	2016-10-21	16:24:46	0
TLC00043.JPG	0	2016-10-22	07:03:48	0
TLC00044.JPG	0	2016-10-22	07:09:58	0
TLC00045.JPG	0	2016-10-22	07:24:38	0
TLC00046.JPG	0	2016-10-22	07:34:46	0
TLC00047.JPG	0	2016-10-22	07:38:24	0
TLC00048.JPG	0	2016-10-22	08:33:38	0
TLC00049.JPG	0	2016-10-22	10:23:50	0
TLC00050.JPG	0	2016-10-22	10:47:22	0
TLC00051.JPG	0	2016-10-22	10:50:14	0
TLC00052.JPG	0	2016-10-22	11:01:32	0
TLC00053.JPG	0	2016-10-22	11:30:52	0
TLC00054.JPG	0	2016-10-22	12:24:24	1
TLC00055.JPG	0	2016-10-22	12:24:28	0
TLC00056.JPG	0	2016-10-22	12:57:34	0
TLC00057.JPG	0	2016-10-22	13:01:02	0
TLC00058.JPG	0	2016-10-22	13:07:26	0
TLC00059.JPG	0	2016-10-22	13:27:18	0
TLC00060.JPG	1	2016-10-22	13:30:24	0	Corresponding to the 1st perching event in Data S2
TLC00061.JPG	1	2016-10-22	13:30:48	1	Corresponding to the 1st perching event in Data S2
TLC00062.JPG	1	2016-10-22	13:30:52	0	Corresponding to the 1st perching event in Data S2
TLC00063.JPG	1	2016-10-22	13:31:38	0	Corresponding to the 1st perching event in Data S2
TLC00064.JPG	1	2016-10-22	13:33:20	0	Corresponding to the 1st perching event in Data S2
TLC00065.JPG	1	2016-10-22	13:38:02	0	Corresponding to the 1st perching event in Data S2
TLC00066.JPG	1	2016-10-22	13:39:04	0	Corresponding to the 1st perching event in Data S2
TLC00067.JPG	1	2016-10-22	13:43:16	0	Corresponding to the 1st perching event in Data S2
TLC00068.JPG	1	2016-10-22	13:43:26	1	Corresponding to the 1st perching event in Data S2
TLC00069.JPG	1	2016-10-22	13:43:30	0	Corresponding to the 1st perching event in Data S2
TLC00070.JPG	1	2016-10-22	13:43:54	1	Corresponding to the 1st perching event in Data S2
TLC00071.JPG	0	2016-10-22	13:43:56	0	Corresponding to the 1st perching event in Data S2
TLC00072.JPG	1	2016-10-22	13:44:06	1	Corresponding to the 1st perching event in Data S2
TLC00073.JPG	1	2016-10-22	13:44:10	0	Corresponding to the 1st perching event in Data S2
TLC00074.JPG	1	2016-10-22	13:45:24	0	Corresponding to the 1st perching event in Data S2
TLC00075.JPG	1	2016-10-22	13:46:46	0	Corresponding to the 1st perching event in Data S2
TLC00076.JPG	1	2016-10-22	13:50:38	1	Corresponding to the 1st perching event in Data S2
TLC00077.JPG	1	2016-10-22	13:50:42	0	Corresponding to the 1st perching event in Data S2
TLC00078.JPG	1	2016-10-22	13:50:54	1	Corresponding to the 1st perching event in Data S2
TLC00079.JPG	1	2016-10-22	13:50:58	0	Corresponding to the 1st perching event in Data S2
TLC00080.JPG	1	2016-10-22	13:51:50	0	Corresponding to the 1st perching event in Data S2
TLC00081.JPG	1	2016-10-22	13:54:30	0	Corresponding to the 1st perching event in Data S2
TLC00082.JPG	0	2016-10-22	15:25:38	0
(b) "Pond"
file name*	proper detection	date	timestamp	not analyzed to avoid double count**	remarks
TLC00009.JPG	0	2016-10-21	08:07:42	0
TLC00010.JPG	0	2016-10-21	08:08:00	1
TLC00011.JPG	0	2016-10-21	08:08:02	0
TLC00012.JPG	0	2016-10-21	08:12:22	0
TLC00013.JPG	0	2016-10-21	08:12:40	1
TLC00014.JPG	0	2016-10-21	08:12:44	0
TLC00015.JPG	0	2016-10-21	08:14:44	0
TLC00016.JPG	0	2016-10-21	08:20:04	0
TLC00017.JPG	0	2016-10-21	08:26:58	0
TLC00018.JPG	0	2016-10-21	08:28:50	0
TLC00019.JPG	0	2016-10-21	08:32:08	0
TLC00020.JPG	0	2016-10-21	08:32:34	1
TLC00021.JPG	0	2016-10-21	08:32:36	0
TLC00022.JPG	0	2016-10-21	08:35:16	0
TLC00023.JPG	0	2016-10-21	08:36:12	0
TLC00024.JPG	0	2016-10-21	08:36:30	1
TLC00025.JPG	0	2016-10-21	08:36:34	0
TLC00026.JPG	0	2016-10-21	08:39:14	0
TLC00027.JPG	0	2016-10-21	08:41:16	1
TLC00028.JPG	0	2016-10-21	08:41:18	0
TLC00029.JPG	0	2016-10-21	08:44:18	0
TLC00030.JPG	0	2016-10-21	08:45:46	0
TLC00031.JPG	0	2016-10-21	08:48:08	0
TLC00032.JPG	0	2016-10-21	08:49:16	0
TLC00033.JPG	0	2016-10-21	08:50:04	0
TLC00034.JPG	0	2016-10-21	08:51:20	0
TLC00035.JPG	0	2016-10-21	08:52:00	0
TLC00036.JPG	1	2016-10-21	10:19:26	0	Corresponding to the 1st perching event in Data S2
TLC00037.JPG	1	2016-10-21	10:22:28	0	Corresponding to the 2nd perching event in Data S2
TLC00038.JPG	1	2016-10-21	10:23:34	0	Corresponding to the 2nd perching event in Data S2
TLC00039.JPG	1	2016-10-21	10:23:44	1	Corresponding to the 2nd perching event in Data S2
TLC00040.JPG	1	2016-10-21	10:23:46	0	Corresponding to the 2nd perching event in Data S2
TLC00041.JPG	1	2016-10-21	10:25:50	0	Corresponding to the 2nd perching event in Data S2
TLC00042.JPG	1	2016-10-21	10:26:32	0	Corresponding to the 2nd perching event in Data S2
TLC00043.JPG	1	2016-10-21	10:34:00	0	Corresponding to the 2nd perching event in Data S2
TLC00044.JPG	1	2016-10-21	10:34:12	1	Corresponding to the 2nd perching event in Data S2
TLC00045.JPG	1	2016-10-21	10:34:16	0	Corresponding to the 2nd perching event in Data S2
TLC00046.JPG	1	2016-10-21	10:34:46	1	Corresponding to the 2nd perching event in Data S2
TLC00047.JPG	1	2016-10-21	10:34:48	0	Corresponding to the 2nd perching event in Data S2
TLC00048.JPG	1	2016-10-21	10:35:10	1	Corresponding to the 2nd perching event in Data S2
TLC00049.JPG	1	2016-10-21	10:35:14	0	Corresponding to the 2nd perching event in Data S2
TLC00050.JPG	1	2016-10-21	10:52:34	0	Corresponding to the 3rd perching event in Data S2
TLC00051.JPG	1	2016-10-21	10:53:42	1	Corresponding to the 3rd perching event in Data S2
TLC00052.JPG	1	2016-10-21	10:53:46	0	Corresponding to the 3rd perching event in Data S2
TLC00053.JPG	1	2016-10-21	10:54:26	0	Corresponding to the 3rd perching event in Data S2
TLC00054.JPG	1	2016-10-21	10:54:54	1	Corresponding to the 3rd perching event in Data S2
TLC00055.JPG	1	2016-10-21	10:54:58	0	Corresponding to the 3rd perching event in Data S2
TLC00056.JPG	1	2016-10-21	10:55:44	0	Corresponding to the 3rd perching event in Data S2
TLC00057.JPG	0	2016-10-21	11:38:44	0
TLC00058.JPG	1	2016-10-21	12:10:26	0	Corresponding to the 5th perching event in Data S2
TLC00059.JPG	1	2016-10-21	12:11:32	0	Corresponding to the 5th perching event in Data S2
TLC00060.JPG	1	2016-10-21	12:15:10	0	Corresponding to the 5th perching event in Data S2
TLC00061.JPG	1	2016-10-21	12:16:00	0	Corresponding to the 5th perching event in Data S2
TLC00062.JPG	1	2016-10-21	12:17:14	0	Corresponding to the 5th perching event in Data S2
TLC00063.JPG	1	2016-10-21	12:58:18	0	Corresponding to the 6th perching event in Data S2
TLC00064.JPG	1	2016-10-21	13:09:22	0	Corresponding to the 6th perching event in Data S2
TLC00065.JPG	1	2016-10-21	13:12:36	0	Corresponding to the 6th perching event in Data S2
TLC00066.JPG	1	2016-10-21	13:14:44	0	Corresponding to the 6th perching event in Data S2
TLC00067.JPG	1	2016-10-21	13:16:32	0	Corresponding to the 6th perching event in Data S2
TLC00068.JPG	1	2016-10-21	13:21:58	0	Corresponding to the 6th perching event in Data S2
TLC00069.JPG	1	2016-10-21	13:22:34	0	Corresponding to the 6th perching event in Data S2
TLC00070.JPG	1	2016-10-21	13:23:14	0	Corresponding to the 6th perching event in Data S2
TLC00071.JPG	1	2016-10-21	13:24:16	0	Corresponding to the 6th perching event in Data S2
TLC00072.JPG	1	2016-10-21	13:25:34	0	Corresponding to the 6th perching event in Data S2
TLC00073.JPG	1	2016-10-21	13:26:16	1	Corresponding to the 6th perching event in Data S2
TLC00074.JPG	1	2016-10-21	13:26:20	0	Corresponding to the 6th perching event in Data S2
TLC00075.JPG	1	2016-10-21	13:26:38	1	Corresponding to the 6th perching event in Data S2
TLC00076.JPG	1	2016-10-21	13:26:40	0	Corresponding to the 6th perching event in Data S2
TLC00077.JPG	1	2016-10-21	13:28:42	0	Corresponding to the 6th perching event in Data S2
TLC00078.JPG	1	2016-10-21	13:29:56	0	Corresponding to the 6th perching event in Data S2
TLC00079.JPG	1	2016-10-21	13:31:04	0	Corresponding to the 6th perching event in Data S2
TLC00080.JPG	1	2016-10-21	13:31:22	1	Corresponding to the 6th perching event in Data S2
TLC00081.JPG	1	2016-10-21	13:31:26	0	Corresponding to the 6th perching event in Data S2
TLC00082.JPG	1	2016-10-21	13:31:40	1	Corresponding to the 6th perching event in Data S2
TLC00083.JPG	1	2016-10-21	13:31:44	0	Corresponding to the 6th perching event in Data S2
TLC00084.JPG	1	2016-10-21	13:32:26	0	Corresponding to the 6th perching event in Data S2
TLC00085.JPG	0	2016-10-21	13:34:00	0
TLC00086.JPG	0	2016-10-21	13:34:28	1
TLC00087.JPG	0	2016-10-21	13:34:30	0
TLC00088.JPG	1	2016-10-21	13:54:36	0	Corresponding to the 9th perching event in Data S2
TLC00089.JPG	1	2016-10-21	13:55:44	0	Corresponding to the 9th perching event in Data S2
TLC00090.JPG	1	2016-10-21	13:56:32	0	Corresponding to the 9th perching event in Data S2
TLC00091.JPG	1	2016-10-21	13:57:30	0	Corresponding to the 9th perching event in Data S2
TLC00092.JPG	1	2016-10-21	14:04:40	0	Corresponding to the 10th perching event in Data S2
TLC00093.JPG	1	2016-10-21	14:05:12	1	Corresponding to the 10th perching event in Data S2
TLC00094.JPG	1	2016-10-21	14:05:14	0	Corresponding to the 10th perching event in Data S2
TLC00095.JPG	1	2016-10-21	14:05:52	0	Corresponding to the 10th perching event in Data S2
TLC00096.JPG	1	2016-10-21	14:06:32	0	Corresponding to the 10th perching event in Data S2
TLC00097.JPG	1	2016-10-21	14:06:44	1	Corresponding to the 10th perching event in Data S2
TLC00098.JPG	1	2016-10-21	14:06:46	0	Corresponding to the 10th perching event in Data S2
TLC00099.JPG	1	2016-10-21	14:07:50	0	Corresponding to the 10th perching event in Data S2
TLC00100.JPG	1	2016-10-21	14:11:04	0	Corresponding to the 11th perching event in Data S2
TLC00101.JPG	1	2016-10-21	14:12:44	0	Corresponding to the 11th perching event in Data S2
TLC00102.JPG	0	2016-10-21	14:19:34	0
TLC00103.JPG	0	2016-10-21	14:20:30	0
TLC00104.JPG	0	2016-10-21	14:22:20	0
TLC00105.JPG	0	2016-10-21	14:22:30	0
TLC00106.JPG	0	2016-10-21	14:22:54	1
TLC00107.JPG	0	2016-10-21	14:22:58	0
TLC00108.JPG	0	2016-10-21	14:39:42	0
TLC00109.JPG	0	2016-10-21	14:52:30	0
TLC00110.JPG	0	2016-10-21	14:54:34	0
TLC00111.JPG	0	2016-10-21	14:57:50	0
TLC00112.JPG	0	2016-10-21	15:14:00	0
TLC00113.JPG	0	2016-10-21	15:16:20	0
TLC00114.JPG	0	2016-10-21	15:45:54	0
TLC00115.JPG	0	2016-10-21	15:46:46	0
TLC00116.JPG	0	2016-10-21	15:50:54	0
TLC00117.JPG	0	2016-10-22	07:23:40	0
TLC00118.JPG	0	2016-10-22	07:32:48	0
TLC00119.JPG	0	2016-10-22	08:28:22	0
TLC00120.JPG	0	2016-10-22	08:31:38	0
TLC00121.JPG	0	2016-10-22	10:19:50	0
TLC00122.JPG	0	2016-10-22	10:25:12	0
TLC00123.JPG	0	2016-10-22	10:26:20	0
TLC00124.JPG	0	2016-10-22	11:01:22	0
TLC00125.JPG	0	2016-10-22	11:29:28	0
TLC00126.JPG	0	2016-10-22	12:11:26	0
TLC00127.JPG	0	2016-10-22	12:55:50	0
TLC00128.JPG	0	2016-10-22	13:25:52	0
(c) "Rooftop"
file name*	proper detection	date	timestamp	not analyzed to avoid double count**	remarks
TLC00002.JPG	0	2016-10-21	08:05:10	1
TLC00003.JPG	0	2016-10-21	08:05:14	0
TLC00004.JPG	0	2016-10-21	08:05:40	1
TLC00005.JPG	0	2016-10-21	08:05:44	0
TLC00006.JPG	0	2016-10-21	08:08:28	0
TLC00007.JPG	0	2016-10-21	08:12:58	0
TLC00008.JPG	0	2016-10-21	08:14:04	0
TLC00009.JPG	0	2016-10-21	08:15:08	0
TLC00010.JPG	0	2016-10-21	08:27:38	0
TLC00011.JPG	0	2016-10-21	08:29:16	0
TLC00012.JPG	0	2016-10-22	07:22:14	0
TLC00013.JPG	0	2016-10-22	08:18:56	0
TLC00014.JPG	0	2016-10-22	08:23:54	1
TLC00015.JPG	0	2016-10-22	08:23:56	0
TLC00016.JPG	0	2016-10-22	08:33:52	0
TLC00017.JPG	0	2016-10-22	08:37:08	0
TLC00018.JPG	0	2016-10-22	09:14:48	0
TLC00019.JPG	0	2016-10-22	09:16:36	0
TLC00020.JPG	0	2016-10-22	11:30:00	0
TLC00021.JPG	0	2016-10-22	12:56:14	0
*Image files from 8:05 21th October to 17:30 22th October were evaluated.
**For photos taken within a few seconds (< 5 seconds in a precise sense), the first was removed from the analysis. These images resulted from commands for rebooting the camera when it was already active and led to overestimates of true positives.
